# Supplementary material
Source: Research Square preprint supplement (doi:10.21203/rs.3.rs-10133417/v1)
Supplement: Supplementary file 1 [file bed1970cd1c8ca882ccba4c4.docx]

**Electronic Supplemental Material 1**

**Ordination summaries for hydrology, weather, and habitat variables.**

This supplement provides component or dimension summaries, variable loadings or squared loadings, habitat category frequencies, and Kruskal–Wallis tests comparing species scores on retained ordination axes. Hydrology and weather variables were analyzed using principal component analysis (PCA). Because habitat variables were categorical, habitat structure was analyzed using multiple correspondence analysis (MCA). We present the first three retained habitat dimensions because these were interpreted in the main text; for full transparency, the complete 14-dimension MCA output is provided separately in Table S3d.

**Table S1. Hydrology PCA**

Table S1a. Hydrology PCA: Component summary

| Component | Eigenvalue | % Variance | Cumulative % |
| --- | --- | --- | --- |
| PC1 | 1.6434 | 54.78 | 54.78 |
| PC2 | 0.9716 | 32.39 | 87.17 |
| PC3 | 0.385 | 12.83 | 100 |

Table S1b. Hydrology PCA: Variable loadings

| Variable | PC1 | PC2 | PC3 |
| --- | --- | --- | --- |
| Estimated distance to nearest water resource (m) | 0.3514 | 0.8852 | 0.305 |
| Estimated distance to major river (m) | 0.6231 | -0.4642 | 0.6295 |
| Calculated distance to confluence | 0.6988 | -0.0311 | -0.7147 |

Table S1c. Kruskal-Wallis tests on hydrology PCA Scores by species

| Component | χ² | df | p |
| --- | --- | --- | --- |
| PC1 | 0.87 | 2 | 0.647 |
| PC2 | 2.429 | 2 | 0.297 |
| PC3 | 2.586 | 2 | 0.274 |

**Table S2. Weather PCA**

Table S2a. Weather PCA: Component summary

| Component | Eigenvalue | % Variance | Cumulative % |
| --- | --- | --- | --- |
| PC1 | 1.6663 | 55.54 | 55.54 |
| PC2 | 1.0105 | 33.68 | 89.23 |
| PC3 | 0.3232 | 10.77 | 100 |

Table S2b. Weather PCA: Variable loadings

| Variable | PC1 | PC2 | PC3 |
| --- | --- | --- | --- |
| Daily mean air temperature | -0.2635 | -0.9215 | -0.2855 |
| Daily mean relative humidity | -0.6533 | 0.3882 | -0.65 |
| Total daily rainfall | -0.7098 | -0.0153 | 0.7043 |

Table S2c. Kruskal-Wallis tests on weather PCA scores by species

| Component | χ² | df | p |
| --- | --- | --- | --- |
| PC1 | 3.887 | 2 | 0.143 |
| PC2 | 1.152 | 2 | 0.562 |
| PC3 | 1.421 | 2 | 0.491 |

**Table S3. Habitat MCA**

Table S3a. Habitat MCA: Retained dimension summary

| Dimension | Eigenvalue | % Variance | Cumulative % |
| --- | --- | --- | --- |
| Dim 1 | 2.222 | 13.89 | 13.89 |
| Dim 2 | 2.1085 | 13.18 | 27.07 |
| Dim 3 | 1.472 | 9.2 | 36.27 |

Table S3b. Habitat MCA: squared loadings for retained dimensions

| Variable | Dim 1 | Dim 2 | Dim 3 |
| --- | --- | --- | --- |
| Forest type | 0.3568 | 0.2166 | 0.6431 |
| Edge use | 0.9436 | 0.9634 | 0.7851 |
| Human influence | 0.9217 | 0.9286 | 0.0439 |

Table S3c. Habitat category frequencies

| Variable | Category | n |
| --- | --- | --- |
| Forest type | Old Growth Forest | 35 |
| Forest type | Secondary Forest | 21 |
| Forest type | Abandoned Agroforestry | 20 |
| Forest type | Selectively Logged Forest | 7 |
| Forest type | Abandoned Plantations | 3 |
| Forest type | Shaded Pasture | 3 |
| Forest type | Ecological Reserve | 1 |
| Forest type | Forested Swamps | 1 |
| Edge Use | Water Edge | 34 |
| Edge Use | Non-Edge | 27 |
| Edge Use | Natural Forest Edge | 10 |
| Edge Use | Property Edge | 8 |
| Edge Use | Natural non-Forest Edge | 5 |
| Edge Use | Road Edge | 4 |
| Edge Use | Urban Edge | 2 |
| Edge Use | Agricultural Edge | 1 |
| Human Influence | Natural Edge | 44 |
| Human Influence | Non-Edge | 27 |
| Human Influence | Anthropogenic Edge | 20 |
